# Supplementary material for: No longer Demospongiae: Homoscleromorpha formal nomination as a fourth class of Porifera
Source: Springer Nature journal article supplement (doi:10.1007/s10750-011-0842-x), 2011-08-11
Supplement: MOESM1 [file 10750_2011_842_MOESM1_ESM.doc]

**Remarks**:

Even though the *PhyloCode* version 4c (http://www.ohio.edu/phylocode) is still a draft (it has not been formally implemented yet), it has already been used for several phyla, including sponges (Manuel et al., 2003; Borchiellini et al., 2004; Cárdenas et al., 2010, 2011; Gazave et al., 2010b). In our opinion, this pre-*PhyloCode* era is not only an opportunity to make the scientific community better acquainted with the *PhyloCode* but also to discuss and polish the definitions we want to give for these clades, before their formal and official acceptance.

We have defined, under the *PhyloCode*, five homoscleromorph clades. We have named only clades that are well supported (BP ≥70 %) in the previous phylogenetic studies mentioned in the text (Philippe et al., 2009; Gazave et al., 2010; Pick et al., 2010). To avoid a proliferation of names, we have favored the conversion of pre-existing names from the Linnaean classification.While some apomorphy-based definitions are suggested, the majority of definitions are branch-based because in most cases taxon sampling needs to be increased before stable apomorphy-based definitions can be derived.

Homoscleromorpha *PhyloCode* names in hierarchical order:

***HomoscleromorphaP*** (*nomen cladi conversum* ex Homoscleromorpha Lévi, 1973).

Authorship of *PhyloCode* name. — Borchiellini et al., 2004.

Definition.— (branch-based) the most inclusive clade of Porifera which includes *Oscarella lobularis* (Schmidt, 1862) and not *Geodia cydonium* (Jameson, 1811), *Leucosolenia variabilis* (Haeckel, 1870), *Oopsacas minuta* Topsent, 1927, *Hydra circumcincta* Schulze, 1914, and *Beroe ovata* Brugière, 1789.

Comments on definition. — Possible autapomorphies are: flagellated exopinacocytes and endopinacocytes, peculiar flagellated apopylar cells, a cinctoblastula larva, amorphous axial filament and basement membrane with type IV collagen. The original definition used *Hydra* *viridis* as a specifier (reference point) but this is a mistake since it was not part of the phylogenetic tree of Borchiellini et al. 2004: we replace it here by *Hydra circumcincta*.

Reference phylogeny. — Borchiellini et al., 2004; Philippe et al., 2009 ; Picks et al., 2010.

***OscarellidaeP*** (*nomen cladi conversum* ex Oscarellidae Lendenfeld, 1887).

Authorship of *PhyloCode* name. — This study.

Definition.— (Branch-based) the most inclusive clade containing *Oscarella lobularis*

(Schmidt, 1862) and not *Corticium candelabrum* Schmidt, 1862.

Comments on definition. — We decided not to choose an apomorphy-based definition for this clade since it is unclear whether the absence of spicules in this group is primary (plesiomorphic) or due to secondary loss. We also decided not to use mitochondrial gene arrangement in the Oscarellidae as a possible autapomorphy, considering it less practical for clade definition (Gazave et al., 2010a).

Reference phylogenies. — Gazave et al., 2010a.

***PlakinidaeP*** (*nomen cladi conversum* ex *Plakinidae* Schulze, 1880).

Authorship of *PhyloCode* name. — This study.

Definition.— (Branch-based) the most inclusive clade containing *Plakina monolopha* Schulze, 1880 and not *Oscarella lobularis* (Schmidt, 1862).

Comments on definition. — A possible autapomorphy of this clade is a peculiar tetractine spicule (small reduced, ramified calthrops).

Reference phylogenies. — Gazave et al., 2010a.

***CorticiumP*** (*nomen cladi conversum* ex *Corticium* Schmidt, 1862).

Authorship of *PhyloCode* name. — This study.

Definition.— (Apomorphy-based) the clade originating with the first species to have candelabra spicules (heterolophose calthrop) as inherited by *Corticium candelabrum* Schmidt, 1862.

Reference phylogenies. — Gazave et al., 2010a.

***PlakostrellaP*** (*nomen cladi novum*).

Authorship of *PhyloCode* name. — This study.

Origin of name. — A combination of the genus names *Plakortis* and *Plakinastrella*, both part of this clade.

Definition.— (Apomorphy-based) the clade originating with the first species to have alophose spicules as inherited by *Plakortis simplex* Schulze, 1880.

Reference phylogenies. — Gazave et al., 2010a.

***TetralophosaP*** (*nomen cladi novum*).

Authorship of *PhyloCode* name. — This study.

Origin of name. — In reference to tetralophose calthrop (see below).

Definition.— (Branch-based) the most inclusive clade containing *Plakina trilopha* Schulze, 1880 and not *Plakina monolopha* Schulze, 1880 and *Corticium candelabrum* Schmidt, 1862.

Comments on definition. — Possible autapomorphies of this clade are a well-developed mesohyl, well-differentiated ectosome, large subectosomal cavities and tetralophose calthrops. Since the type-species of the genus *Plakina* (*Plakina monolopha*) does not pertain to this clade, the genus name *Plakina* cannot be converted here.

Reference phylogenies. — Gazave et al., 2010a.
